# Supplementary material for: pH-Dependent assembly of three novel inorganic–organic hybrids based on different isopolymolybdates and CuI/II(bbx)nunits
Source: Royal Society of Chemistry journal article supplement (doi:10.1039/c6ce00776g), 2016-01-01
Supplement: c6ce00776g1.pdf [file c6ce00776g1.pdf]

## pH-Dependent Assembly of Three Novel Inorganic-Organic Hybrids Based on Different Isopolymolybdates and Cu<sup>II</sup>(bbx)<sub>n</sub>

### Units

Panfeng Wu , Qi Xue, Xinbo Dong, Yanjie Zhang, Bin Liu, Huaiming Hu, Ganglin Xue\*

*Key Laboratory of Synthetic and Natural Functional Molecule (Ministry of Education), Department of Chemistry, Northwest University, Xi'an, 710069, China. E-mail: [xglin707@163.com](mailto:xglin707@163.com)*

Table S1. Selected bond lengths (Å) and angles (°) of the compounds 1–3.

| Compound 1        |          |                    |          |
|-------------------|----------|--------------------|----------|
| Cu(1)-N(4)#1      | 1.909(8) | Cu(1)-N(1)         | 1.944(8) |
| Cu(1)-O(9)        | 1.993(6) | Cu(1)-O(14)        | 2.045(7) |
| Mo(1)-O(6)        | 1.688(6) | Mo(1)-O(7)         | 1.719(6) |
| Mo(1)-O(5)        | 1.938(6) | Mo(1)-O(4)         | 1.959(6) |
| Mo(1)-O(13)       | 2.158(6) | Mo(1)-O(13)#2      | 2.336(6) |
| Mo(2)-O(12)       | 1.685(7) | Mo(2)-O(9)         | 1.713(6) |
| Mo(2)-O(1)        | 1.886(7) | Mo(2)-O(10)        | 1.912(7) |
| Mo(2)-O(7)#2      | 2.275(7) | Mo(2)-O(13)        | 2.357(6) |
| Mo(3)-O(11)       | 1.707(6) | Mo(3)-O(2)         | 1.712(7) |
| Mo(3)-O(10)       | 1.876(6) | Mo(3)-O(4)         | 1.975(6) |
| Mo(3)-O(5)#2      | 2.313(6) | Mo(3)-O(13)        | 2.343(6) |
| Mo(4)-O(8)        | 1.680(7) | Mo(4)-O(3)         | 1.717(7) |
| Mo(4)-O(1)        | 1.898(7) | Mo(4)-O(5)         | 1.989(6) |
| Mo(4)-O(4)#2      | 2.328(6) | Mo(4)-O(13)        | 2.355(6) |
| O(4)-Mo(4)#2      | 2.328(6) | O(5)-Mo(3)#2       | 2.313(6) |
| O(7)-Mo(2)#2      | 2.275(7) | O(13)-Mo(1)#2      | 2.336(6) |
| N(4)-Cu(1)#3      | 1.909(8) | N(4)#1-Cu(1)-O(9)  | 89.4(3)  |
| N(4)#1-Cu(1)-N(1) | 172.5(4) | N(4)#1-Cu(1)-O(14) | 90.1(3)  |
| N(1)-Cu(1)-O(9)   | 85.4(3)  | O(9)-Cu(1)-O(14)   | 163.3(3) |
| N(1)-Cu(1)-O(14)  | 96.4(3)  |                    |          |
| Compound 2        |          |                    |          |
| N(8)-Cu(1)#1      | 2.003(5) | N(4)-Cu(1)#2       | 1.969(5) |
| Mo(1)-O(6)        | 1.729(4) | Mo(1)-O(13)        | 1.700(4) |
| Mo(1)-O(7)        | 1.913(4) | Mo(1)-O(2)         | 1.880(4) |
| Mo(1)-O(7)#3      | 2.385(4) | Mo(1)-O(1)         | 2.293(4) |
| Mo(2)-O(4)        | 1.692(5) | Mo(2)-O(5)         | 1.689(4) |
| Mo(2)-O(1)        | 1.869(4) | Mo(2)-O(3)         | 1.822(4) |
| Mo(3)-O(12)       | 1.686(4) | Mo(2)-O(2)         | 2.413(4) |

|                     |           |                    |           |
|---------------------|-----------|--------------------|-----------|
| Mo(3)-O(10)         | 1.905(4)  | Mo(3)-O(11)        | 1.707(4)  |
| Mo(3)-O(2)#3        | 2.114(4)  | Mo(3)-O(3)#3       | 2.008(4)  |
| Mo(4)-O(9)          | 1.687(5)  | Mo(3)-O(7)         | 2.519(4)  |
| Mo(4)-O(10)         | 1.900(4)  | Mo(4)-O(8)         | 1.692(5)  |
| Mo(4)-O(7)          | 2.229(4)  | Mo(4)-O(1)         | 2.017(4)  |
| Cu(1)-N(4)#4        | 1.969(5)  | Mo(4)-O(6)#3       | 2.364(4)  |
| Cu(1)-N(5)          | 1.987(5)  | Cu(1)-N(1)         | 1.983(5)  |
| Cu(1)-O(11)         | 2.408(5)  | Cu(1)-N(8)#5       | 2.003(5)  |
| O(7)-Mo(1)#3        | 2.385(4)  | N(4)#4-Cu(1)-N(1)  | 172.7(2)  |
| N(4)#4-Cu(1)-N(5)   | 92.3(2)   | N(1)-Cu(1)-N(5)    | 92.4(2)   |
| N(4)#4-Cu(1)-N(8)#5 | 86.5(2)   | N(1)-Cu(1)-N(8)#5  | 88.3(2)   |
| N(5)-Cu(1)-N(8)#5   | 174.5(2)  | N(4)#4-Cu(1)-O(11) | 93.62(19) |
| N(1)-Cu(1)-O(11)    | 91.84(19) | N(5)-Cu(1)-O(11)   | 90.65(19) |
| <b>Compound 3</b>   |           |                    |           |
| Cu(1)-N(1)#1        | 1.889(5)  | N(1)#1-Cu(1)-O(1)  | 96.1(2)   |
| Cu(1)-O(1)          | 2.269(6)  | N(1)#1-Cu(1)-N(3)  | 165.0(3)  |
| Mo(1)-O(2)          | 1.709(6)  | N(3)-Cu(1)-O(1)    | 98.3(2)   |
| Mo(1)-O(3)#2        | 1.850(15) | Cu(1)-N(3)         | 1.894(5)  |
| O(3)-Mo(1)#2        | 1.850(15) | N(1)-Cu(1)#3       | 1.889(5)  |

Symmetry transformations used to generate equivalent atoms:

Compound 1: #1  $x-1/2, -y+3/2, z+1/2$ ; #2  $-x+1, -y+2, -z+2$ ; #3  $x+1/2, -y+3/2, z-1/2$ .

Compound 2: #1  $-x+3/2, y-1/2, -z+1/2$ ; #2  $x+1, y, z$ ; #3  $-x+2, -y, -z+1$ ; #4  $x-1, y, z$ ; #5  $-x+3/2, y+1/2, -z+1/2$ .

Compound 3: #1  $x, y-1, z$ ; #2  $-x+3/2, -y+3/2, -z$ ; #3  $x, y+1, z$ .

Magnetism measurements were performed on a Quantum Design MPMS SQUID magnetometer. The experimental susceptibilities were corrected for the diamagnetism of the constituent atoms (Pascal's tables).

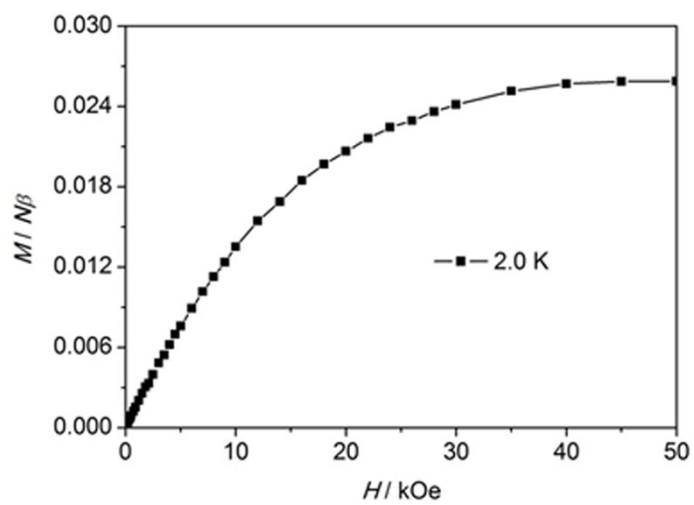

**Fig. S1.**  $M(H)$  data for polycrystalline samples of compound **3** at 2.0 K.

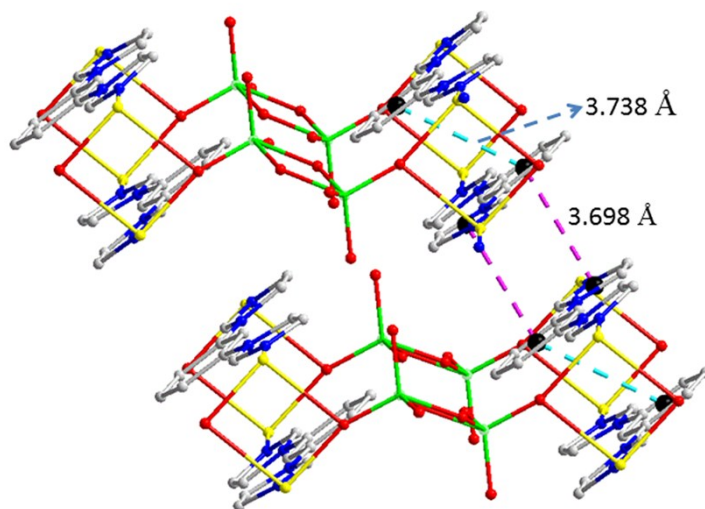

**Fig. S2.** The detail of  $\pi$ - $\pi$  interactions in **3**.

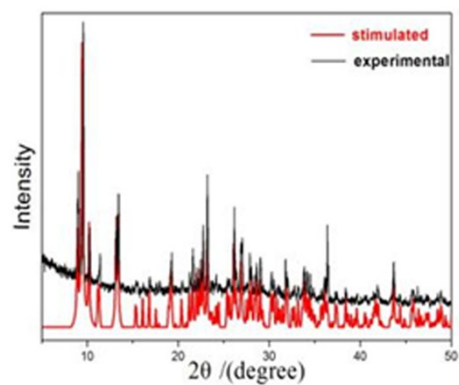

(1)

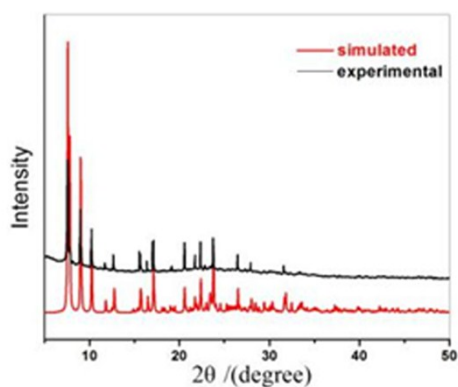

(2)

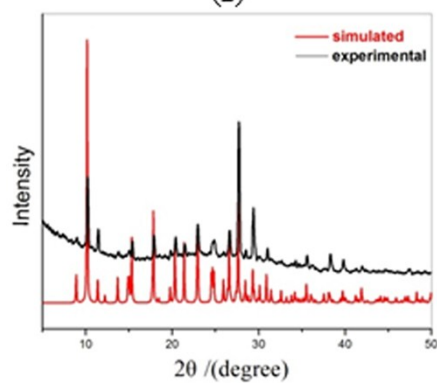

(3)

Fig. S3. PXRD patterns for simulated and experimental samples 1-3.

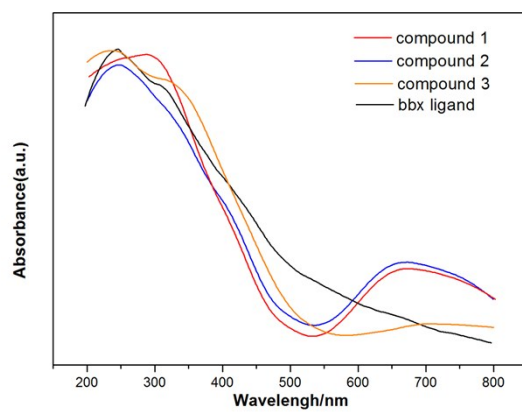

Fig. S4. UV-vis absorption spectra for compounds 1-3.

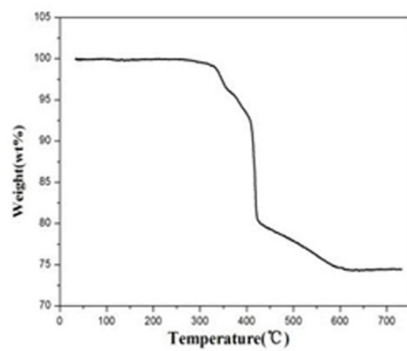

(1)

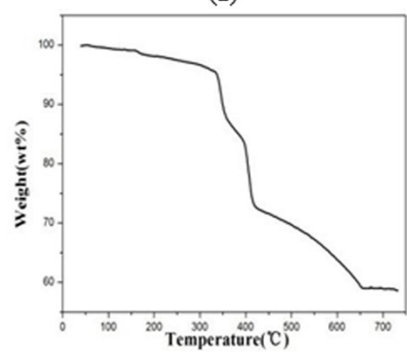

(2)

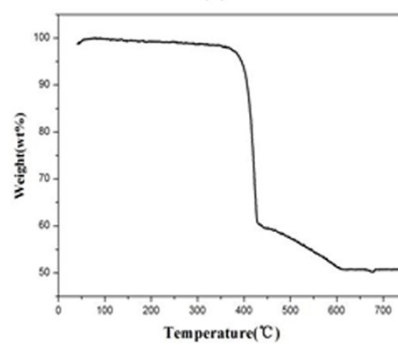

(3)

Fig. S5. TG curve of compounds 1-3.

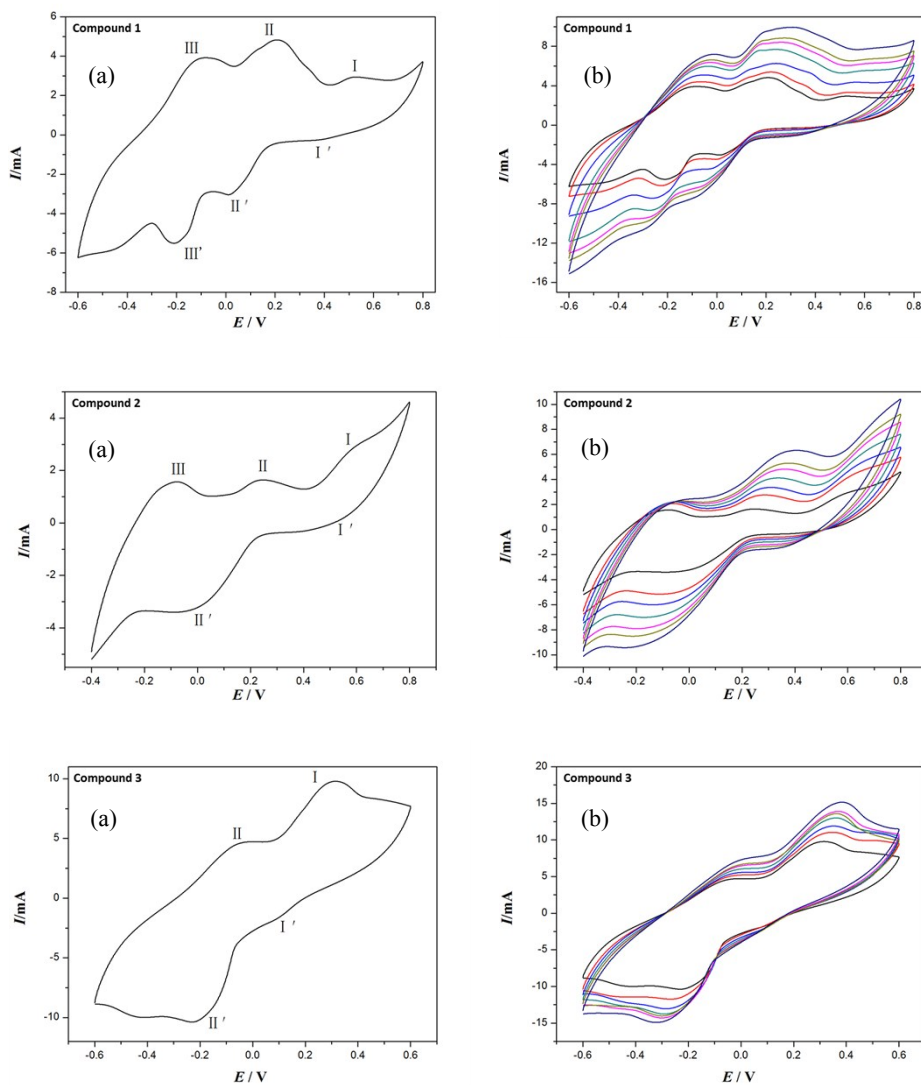

**Fig. S6.** (a) Cyclic voltammograms of Compounds **1-3** in 1 M H<sub>2</sub>SO<sub>4</sub> at scan rates of 60mV/s. (b) Cyclic voltammograms of Compounds **1-3** in 1 M H<sub>2</sub>SO<sub>4</sub> at different scan rates (from inner to outer: 60, 80, 100, 120, 140, 160, 200mV/s).

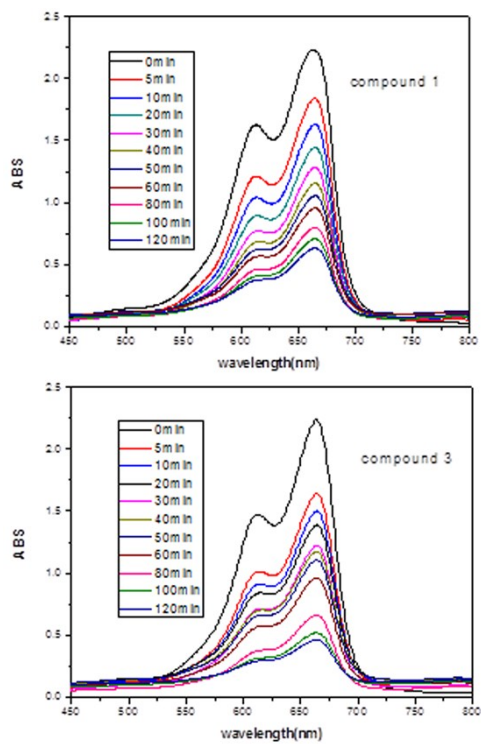

**Fig. S7.** Absorption spectra of the MB solution during the decomposition reaction use of PMS as compounds **1** and **3**.
